# Supplementary material
Source: publisher site journal article supplement (https://www.dovepress.com/article/340452)
Supplement: Supplementary file 1 [file get_supplementary_file.php]

1 **Table S1.** Primer sequences.

| Gene Symbol | Forward Primer (5' → 3') | Reverse Primer (5' → 3') |
|-------------|--------------------------|--------------------------|
| THY1        | ATCGCTCTCCTGCTAACAGTC    | CTCGTACTGGATGGGTGAACT    |
| BMP2        | ACCCGCTGTCTTCTAGCGT      | TTTCAGGCCGAACATGCTGAG    |
| LOX         | GCCGACCAAGATATTCCTGGG    | GCAGGTCATAGTGGCTAAACTC   |
| KDR         | GTGATCGGAAATGACACTGGAG   | CATGTTGGTCACTAACAGAAGCA  |
| MMP9        | GGGACGCAGACATCGTCATC     | TCGTCATCGTCGAAATGGGC     |
| ACTB        | TTCCTTCTGGGCATGGAGTCCT   | TTGGCGTACAGGTCTTTGCGGAT  |

2 **Table S2.** DEGs between the NERD group and the HC group.

| 649 upregulated DEGs (NERD vs. HC) |           |         |            |           |         |
|------------------------------------|-----------|---------|------------|-----------|---------|
| SLC16A1                            | KRT16P2   | PTPRZ1  | KDR        | RPS4Y1    | MYO1B   |
| KRT1                               | FAT1      | SPRR4   | TENM2      | KRT14     | CAPN6   |
| DDX3Y                              | KDM5D     | HK2     | USP9Y      | ABCA12    | TXLNGY  |
| UTY                                | S100A7    | EIF1AY  | KLK5       | FMNL2     | ZFY     |
| BRCA1                              | KLK6      | CASC19  | SERPINB4   | FSCN1     | TTYH3   |
| SH3PXD2B                           | PCDHGC3   | PRKY    | TTY14      | IRS1      | TTY15   |
| CARD18                             | MYH10     | NLGN4Y  | MYO5A      | LINC00278 | MMP12   |
| GALNT18                            | RAPGEF5   | BNC1    | TBX3       | VANGL2    | LAMA1   |
| LRP8                               | SOX4      | TBL1Y   | DLX3       | MTHFD1L   | UBASH3B |
| COL4A1                             | NUP210    | TMSB4Y  | AC011297.1 | ST8SIA6   | RAB3IP  |
| MYO10                              | LEF1      | NAV1    | PTPRD      | FOXP3     | TRPV3   |
| SPRR2G                             | QRFPR     | FXD5    | SIRPA      | LIPN      | LIPG    |
| PRSS12                             | ZNF736P9Y | HMGA2   | GLDC       | ARAP3     | FREM2   |
| CERNA2                             | PXDN      | STEAP1B | ALOX12B    | APLNR     | RGS20   |
| KIRREL1                            | GPR153    | DLG5    | BMP2       | LIPK      | ENAH    |
| KRTDAP                             | EPPK1     | EPHB2   | DMXL2      | ABCA1     | PCSK9   |
| ADARB1                             | GABRA4    | PITX2   | GFPT2      | COL14A1   | S100A7A |

|            |           |            |         |            |            |
|------------|-----------|------------|---------|------------|------------|
| ADGRF5     | TNC       | NPNT       | ZNF827  | BRINP1     | STEAP4     |
| SRY        | GYG2P1    | NRG1       | NMB     | ADAP2      | SQLE       |
| MIR31HG    | AGPAT4    | KRT6A      | PGBD5   | CDHR1      | MMP9       |
| AC011473.4 | KRT16P4   | CD36       | ATP2C2  | SLC4A7     | CASP1P2    |
| THSD7B     | MCM10     | ARSFP1     | SLC15A1 | AP1S3      | CHST11     |
| PTPRG      | NGFR      | THBS2      | SPIN4   | COL6A5     | RNASEH2CP1 |
| EML5       | DOC2B     | MRLN       | MFHAS1  | LRRC4      | CLSPN      |
| POLR3G     | ESYT3     | VSIG8      | PLA2G4E | SPIRE1     | ADAMDEC1   |
| KCNA2      | KRT16P3   | TTBK2      | KRT6C   | SDK1       | NOTCH1     |
| FAM222A    | PIK3R3    | LRP12      | ELOVL7  | CBX2       | PFN2       |
| SFXN5      | DYNAP     | PTHLH      | CHML    | CEMIP      | ARNT2      |
| CCNJL      | ELFN1     | IQCA1      | SEMA3C  | KAZALD1    | ADAM23     |
| OTOP2      | C1orf216  | DZIP1      | FLVCR2  | GDPD2      | HOXA7      |
| ANOS2P     | WFDC12    | FBLIM1     | PDPR    | NRP2       | NKX1-2     |
| PLA2G4D    | LINC01886 | THSD1      | STRA6   | LDLR       | ZBED9      |
| FAM167A    | ABL2      | AL157829.1 | HSPG2   | EPOP       | GABRQ      |
| DLC1       | ALPL      | LTBP1      | LOX     | MICAL2     | SLC36A1    |
| FAM89A     | SPRY4     | COL4A2     | IQGAP2  | LRAT       | COL27A1    |
| CXCL14     | GPRIN1    | SLC7A11    | CHST2   | ERVMER34-1 | AC129492.6 |
| TNFSF18    | GLI2      | TFCP2L1    | OLFML2B | PLAT       | AVPR1A     |
| EREG       | CLSTN2    | ADAMTS14   | PALM    | C1orf226   | CPA6       |
| XRCC2      | GPR37     | SLC26A9    | PXDNL   | PDE10A     | MTCL1      |
| ALOXE3     | MAP7D2    | AC010889.1 | IGFBP6  | PHLDB2     | FSD1L      |
| B4GALNT3   | ANGPTL4   | DPF3       | HOXC8   | AC098864.1 | CD163L1    |
| FBN2       | SEZ6L2    | COL13A1    | PLAG1   | ADAMTS12   | CDC14B     |
| PLPPR4     | DDN       | CDYL2      | KRT16   | ZNF704     | TCAF1P1    |
| GJA3       | COL5A2    | KCNS1      | NID1    | GLT1D1     | DUSP9      |

|            |            |            |            |            |            |
|------------|------------|------------|------------|------------|------------|
| ADGRL3     | TENM3      | COL1A1     | JCAD       | AL161431.1 | HEPH       |
| FGF1       | AACSP1     | TNFRSF10D  | AL049767.1 | LOXL4      | RIMS2      |
| THY1       | LAMP5      | KRT9       | PI3        | TMEM178B   | RNF183     |
| CEP72      | AP001783.1 | MYOM3      | AC125807.2 | CPXM1      | CYP24A1    |
| CRYGS      | KCNN4      | SLAMF7     | LINC02580  | KRT6B      | CCR4       |
| ADAM12     | WNT3       | CHDH       | MMP2       | COL5A1     | MEX3A      |
| TRPM6      | SEZ6L      | AL512363.1 | BGN        | CXCL6      | ZFHX4      |
| CICP16     | AC007182.1 | CHST1      | CACNA1D    | CRACR2A    | AC108010.1 |
| SAA1       | FADS1      | RASL11B    | PKNOX2     | TMEM86A    | FIGN       |
| ZNF469     | BCAN       | SCART1     | NOS1       | PCDHGC4    | FAM169A    |
| NUDT11     | CPNE8      | ATP13A5    | FOSL1      | ADAMTS9    | GJC1       |
| GSDME      | C5AR2      | ACER2      | WDR66      | BPIFC      | ACP7       |
| PCSK2      | TP53TG5    | SERPINE1   | IFNWP19    | IL22RA2    | STRIP2     |
| TCERG1L    | AC138035.1 | HELLPAR    | IGFL1P1    | HECW1      | COL3A1     |
| TFAP2E     | SYT12      | ITGA11     | AL049629.1 | OR2A7      | HMCN1      |
| GLB1L      | PCDHB10    | IFNE       | TMEM45A    | HEPHL1     | ADAMTS7    |
| AL355032.1 | AC018629.1 | ADGRE1     | EFR3B      | COL6A3     | HOXA6      |
| AC009275.1 | LINC02188  | NOX4       | C4B        | MT-TR      | MIR635     |
| IL36G      | GRPEL2-AS1 | AC140479.7 | DBNDD2     | ADAMTS15   | HEY1       |
| SNHG28     | MAPK10     | EGFLAM     | DYSF       | IRX1       | LOXL2      |
| LINC02448  | HOXC13     | FAM157C    | GRIP2      | GUCY1A2    | AC007319.1 |
| RP1L1      | SELE       | C1QL3      | KLK14      | LHFPL2     | DEFB4A     |
| PAPPA      | KIAA1549   | AC012513.3 | CCDC150    | AC018638.2 | FBXL19-AS1 |
| SLC6A17    | NKX3-1     | AKR1B1     | SDK2       | PNMA8A     | VNN3       |
| AC009053.1 | NYAP1      | PCDHGB2    | NOS1AP     | LRRN3      | LRRC37A17P |
| GPR4       | IL33       | SLAMF9     | PRTFDC1    | OTX1       | KSR2       |
| AC010731.2 | AL355336.1 | AOC1       | TAGLN3     | IL1RL1     | AC133919.2 |

|                 |                 |            |            |            |            |
|-----------------|-----------------|------------|------------|------------|------------|
| AADAACL2        | TPRG1-AS1       | GLDCP1     | GPR160     | PHLPP2     | LINC00346  |
| ABCA13          | LCE3E           | FABP4      | NME9       | HRK        | ZFY-AS1    |
| NLGN4X          | HUNK            | PLA2G3     | CECR2      | TLL2       | AL445205.1 |
| SCNN1D          | SLC14A1         | NRCAM      | HAS3       | GPLD1      | P2RY8      |
| CDH11           | AC084337.1      | AC093904.3 | AC006262.1 | MAMLD1     | ATP1B3-AS1 |
| HERC2P9         | HCAR1           | KRT2       | CSMD1      | LUZP2      | OR10H1     |
| AKR1B10         | TM4SF19-<br>AS1 | ADAMTS1    | HS3ST4     | KLK1       | LINC02159  |
| FAM157B         | RIMBP2          | LINC00887  | MFAP3L     | AC021106.1 | MTMR7      |
| LYZ             | COL4A6          | KIF26A     | CHRNA3     | CLCN4      | CORIN      |
| KLK7            | BX537318.2      | M1AP       | PRICKLE1   | VDAC1P8    | AL590434.1 |
| PROX1           | EFCAB2          | PCYT1B     | IGFL2-AS1  | AC105020.1 | RBP1       |
| CXCL8           | PDE7B           | CD22       | SLC38A3    | AC110285.3 | BACH2      |
| AGPAT4-IT1      | AC106038.1      | ARTN       | FER1L6     | CYP2C19    | PICSAR     |
| AC126474.1      | HOXC13-AS       | C5orf17    | FAM184B    | HNF4G      | ANK1       |
| PLA2G4E-<br>AS1 | GUSBP9          | CHODL      | WDR63      | AL355312.3 | AC010761.3 |
| SOS1-IT1        | LCE1C           | SEMA3G     | FBXO16     | APOBEC3A   | C4A        |
| AC099548.2      | SALL4           | AC006460.2 | CERS3-AS1  | ANKRD20A7P | ADCYAP1R1  |
| BLACAT1         | ZBTB40-IT1      | TAF7L      | AL139274.2 | COL12A1    | KRT18P59   |
| AC006058.1      | TSSK4           | WNT11      | CNTF       | AC008764.2 | CFAP45     |
| AC106820.4      | IL10            | TGFB1      | AC145138.1 | ALOX12P2   | U62317.1   |
| U2AF1           | AC004706.3      | AC092881.1 | SNORD17    | RHOXF1-AS1 | ATP1B2     |
| SAMD12-<br>AS1  | SPP1            | LINC00462  | DACH1      | AC138866.1 | PTGS2      |
| AP000688.2      | STK31           | IGHE       | GCLM       | IGSF1      | TMC7       |
| LINC02471       | MISP            | EGR1       | CAPNS1P1   | TEX52      | CCDC170    |

|                                      |            |             |            |                   |            |
|--------------------------------------|------------|-------------|------------|-------------------|------------|
| NPW                                  | AC027228.2 | SAA2        | CR786580.1 | FAM171B           | AC141557.2 |
| PSG4                                 | ABHD12B    | SLC9A2      | MGC12916   | SPRR2F            | SLC16A12   |
| AC006480.2                           | AC091806.1 | AL020997.3  | SMKR1      | SUGCT             | SIGLEC6    |
| OR7M1P                               | CASC15     | AC087783.2  | BCAT1      | TNFRSF10A-<br>AS1 | AC025917.1 |
| DLX4                                 | GAL3ST2    | TMC5        | AC017074.1 | AL359922.2        | AC011483.1 |
| CYP27C1                              | SYNPO2L    | STEAP3-AS1  | LILRA1     | HAS2              | TNFRSF4    |
| IGSF22                               | CD177      | PDE3B       | AL669942.1 | EBF2              | NID2       |
| AC007785.1                           | SULT1B1    | ZBTB16      | SHISAL1    | AC100757.1        | PRTG       |
| AP000347.1                           | ZDHC11B    | IL4I1       | AC087752.3 | RNU6ATAC18P       | TPPP3      |
| ARPC3P1                              | CTH        | LINC01152   | NAIP       | SLC6A14           | CALM2P2    |
| COL1A2                               | HOXC9      | GSTA9P      | GLI1       | NLRP14            | PNLDC1     |
| FAM201B                              | TBC1D3E    | AKR1C2      | MT-TG      | AC073263.1        | TSPAN11    |
| SCN2A                                | AC008610.1 | ST8SIA6-AS1 | CD44-AS1   | POU2AF1           | MUC5B      |
| LINC01273                            |            |             |            |                   |            |
| 546 downregulated DEGs (NERD vs. HC) |            |             |            |                   |            |
| KRT4                                 | COX7A1     | MUC22       | PLEKHG6    | ETNK2             | CHPT1      |
| RFK                                  | FOXN3-AS1  | CRYM        | PAX1       | C15orf62          | RPL9       |
| CDC42EP5                             | CST3       | AC245060.4  | FAM3B      | TSPAN12           | PNPLA4     |
| HES4                                 | NAPRT      | CRTAC1      | CCDC107    | PHYHD1            | GYPC       |
| BX255925.3                           | AC044787.1 | NOXA1       | KRT79      | SNTB1             | KRT40      |
| SETD9                                | HMGCS2     | RECQL4      | SPINT1-AS1 | C8orf82           | MYEOV      |
| GCNT3                                | TMIE       | GNG4        | ASPG       | IL18              | LCN2       |
| CIDECP                               | IL1A       | RORC        | GPT        | CYSLTR1           | PAX8       |
| B4GALT1-<br>AS1                      | AAMDC      | HBB         | MT1X       | KRTAP3-2          | LAYN       |
| RRAS                                 | AL365205.1 | CAMK2N1     | CRISP3     | HNMT              | AC233266.1 |

|            |            |            |                  |             |                  |
|------------|------------|------------|------------------|-------------|------------------|
| AC087741.3 | GGTA1P     | ZBED2      | FMO9P            | MESP1       | ZNF683           |
| PRKAA2     | LMNTD2     | SYT17      | TAS1R3           | CCDC160     | NRTN             |
| BRI3       | AL357033.4 | PRSS27     | METTL24          | CYP4F29P    | CRISP2           |
| HBA2       | ELF5       | ADRA2C     | LINC01587        | RPS20P14    | ADRB2            |
| HS3ST1     | NDRG2      | FNDCA      | IL34             | AC016739.1  | FAHD2B           |
| SOCS2      | PET100     | LRMP       | AP003733.4       | AC015912.3  | DOCK9-DT         |
| CES1P2     | NTN4       | LINC01170  | ZNF135           | AL445524.1  | TTYH1            |
| HOTAIRM1   | ACOT4      | RPL10P9    | INSYN1           | FTH1P8      | MUC1             |
| BCAS1      | HSD11B1L   | HAAO       | AC008969.1       | LINC00492   | SPINK8           |
| AC016582.3 | STRADB     | KCNK12     | LINC01983        | SLURP1      | RDH5             |
| KRT33A     | GOLGA2P10  | IGLV5-52   | FAM124B          | CYP11A1     | AL139384.1       |
| BST1       | GNA14      | C19orf81   | POMC             | LYPD2       | AC245060.5       |
| GBP3       | SCIN       | LINC01358  | AC116345.1       | C5orf66-AS1 | ZNF667-AS1       |
| CAMTA1-DT  | CLVS1      | PKIB       | ADAMTSL4-<br>AS1 | CXCL17      | KRT78            |
| C8orf48    | LRFN2      | RPL39P3    | HIST1H4E         | CCDC184     | GPIHBP1          |
| PPIAP11    | NINJ2      | SUSD3      | AC116312.1       | AL513304.1  | AL450992.2       |
| CD55       | TNNI2      | PAX8-AS1   | AL391361.3       | NKG7        | S1PR4            |
| TMEM171    | RASAL2-AS1 | CDH20      | AP000439.2       | LINC01697   | SYNE4            |
| PLEKHF1    | SYNGR3     | AC008105.2 | VSIG2            | ADAP1       | AL357033.3       |
| RPRML      | PBX4       | BPGM       | PART1            | HLA-B       | DCST2            |
| SYT8       | AC027117.2 | AC004967.1 | CYP2D7           | FAM183A     | CPNE4            |
| AP000692.2 | ATXN2-AS   | LENG9      | PPP1R1B          | PLAC8       | FAM181B          |
| CRCT1      | AC022613.2 | AP002761.1 | ADAD2            | AC092535.4  | AL031777.1       |
| AC233266.2 | TREH       | TBCAP1     | RPL29P11         | CIDEA       | AP000866.2       |
| FAM171A2   | KEL        | ZNF714     | ZNF671           | FTH1P10     | LYNX1-<br>SLURP2 |

|            |            |            |            |            |            |
|------------|------------|------------|------------|------------|------------|
| AC125232.2 | MT1M       | TAF10      | PDE6A      | CD1C       | ZNF92      |
| CYP2T1P    | TBC1D10C   | INSYN1-AS1 | TMEM37     | FCER1A     | ALOX5      |
| AKR7A3     | AL161785.1 | HCP5       | CATSPERG   | LINC00857  | MYRF       |
| FTH1P11    | CYP3A4     | LINC02036  | AC005523.1 | AC144530.1 | IRF1       |
| AC116407.1 | MT1A       | IL12A      | BMS1P12    | AL161421.1 | RNF223     |
| FTH1P2     | STXBP6     | CYP3A5     | ZNF519     | ADARB2     | CMTM8      |
| AC009414.2 | FLJ46906   | HBA1       | UGT2B7     | DUSP14     | QPRT       |
| RPL37P6    | REN        | FGF22      | CXCR3      | MT1L       | FTH1P23    |
| NTF3       | AC073046.1 | LST1       | ZNF582     | AC080038.1 | DUSP13     |
| AC233280.1 | ZCWPW1     | AC118754.1 | PRR15      | LINC02099  | AC020659.1 |
| SNAI3      | TNNC2      | LINC01225  | TGFBR3L    | HLA-H      | KLKP1      |
| HIF3A      | AL356867.1 | AL662844.4 | CD1A       | RPL5P4     | ACOT1      |
| FSTL4      | AC245100.8 | AC025539.1 | APBA1      | LINC01481  | AC009299.2 |
| CD1E       | NOG        | FAM25BP    | ZNF503-AS1 | CSPG4P10   | FTH1       |
| GADD45B    | AC008105.3 | AC020661.3 | AC027117.1 | AC011139.1 | TCAP       |
| FCGR2B     | ADARB2-AS1 | AL139246.5 | SLC25A41   | ZNF835     | EEF1A1P11  |
| AL589986.2 | OXGR1      | TCEAL2     | DMRT2      | TMEM238    | AP006284.1 |
| C2CD4D     | AC008972.2 | KCNMB1     | FTH1P7     | AC140479.5 | AL139393.1 |
| PHBP11     | BEX5       | C16orf54   | IGLC7      | GGACT      | AC003973.3 |
| XCL2       | GZMH       | AC116347.1 | CFL2       | ZNF382     | DUOXA2     |
| NTS        | GPR25      | ZNF208     | SVOPL      | RPSAP9     | CRIP1      |
| MT1G       | COL9A2     | AC024592.2 | AL139095.2 | AP001347.1 | HTR3A      |
| TRG-AS1    | SH2D1B     | MYBPC2     | AQP5       | CD207      | KLRC1      |
| AC010329.1 | PLA2G2A    | MYOM2      | RPS7P10    | RPL13AP7   | KBTBD11    |
| RPL24P2    | MT2A       | LINC00933  | MAFTRR     | LINC01144  | NUS1P1     |
| AC093821.1 | CYP4F35P   | YBX2       | EEF1A2     | TMEM47     | FAM19A3    |
| MATN4      | TSPAN32    | ICAM3      | LINC01978  | AC022706.1 | BCAP31P2   |

|            |                  |            |            |            |            |
|------------|------------------|------------|------------|------------|------------|
| NEXMIF     | EMP3             | PPARGC1A   | ATP5MC2P4  | ADGRE4P    | AC243960.1 |
| SLC2A4     | RARRES3          | RPS3AP25   | RHCE       | TMEM271    | AC016773.1 |
| AC140658.1 | CD40LG           | CAPN13     | PPP1R27    | AL606760.1 | MT1E       |
| LINC00115  | SERHL            | FMO8P      | LPP-AS2    | RAB6B      | MIR4787    |
| AP001610.2 | DNAAF3           | TRBV7-2    | VWC2       | AC010468.1 | MC5R       |
| ITGB2-AS1  | MT1B             | AP001360.2 | CHP2       | ADH1C      | AKR7L      |
| HLA-DOB    | SLAIN1           | AC010615.2 | RPL7P16    | PDXP       | AC008608.2 |
| AL592114.1 | AL390198.1       | KCTD9P4    | LRG1       | AL645608.7 | AC020928.1 |
| AP001412.1 | AP006621.5       | HRAT5      | AC011611.2 | KCNJ11     | LPAR4      |
| COLEC12    | RNF103-<br>CHMP3 | AC015908.3 | AP000936.3 | IL2RG      | RPL15P2    |
| AC072061.1 | AC093249.6       | AC123912.4 | LINC01905  | PSCA       | ADGRD1     |
| CORO6      | AC103706.1       | AC004264.1 | AC005920.1 | LINC00892  | PTH1R      |
| TMEM178A   | FASLG            | PKMP3      | ISM2       | SPINK2     | IGLV1-51   |
| TPT1P5     | KC6              | TNKS2-AS1  | LINC01726  | MAMDC2     | LINC00628  |
| SORD2P     | VN1R81P          | TMEM52     | CKB        | KANSL1-AS1 | AP001062.1 |
| LINC01011  | HSPB1P1          | AC024610.2 | GAST       | SLC5A8     | RPL7AP28   |
| RPRM       | HEATR4           | AP005329.2 | PGPEP1L    | GABRP      | AC006262.4 |
| C16orf86   | MNX1-AS1         | TBX21      | GALR3      | AIM2       | C2CD4C     |
| DKK2       | AC009271.1       | NLRP10     | LRRC26     | ZNF665     | PFN4       |
| TMEM156    | IL23A            | AC142086.1 | AC074212.1 | AL645608.2 | LINC01100  |
| ADM5       | FRG2HP           | AL645940.1 | JARID2-AS1 | PPP1R36    | HLA-DPB1   |
| ANGPTL1    | PROM1            | NPIPA7     | AL121761.1 | LRRC37A7P  | AC021087.1 |
| AP006222.1 | LINC00513        | CCL26      | MT1F       | CCL5       | AL157935.2 |
| GPAT2      | LY9              | KIF7       | SCGB2A1    | TRGV2      | AL590326.1 |
| KRT34      | MT1H             | LRRN4CL    | AP000553.5 | LINC01224  | ADRA2B     |
| AL391001.1 | GAPDHP65         | CRTAM      | AC107464.3 | AC245033.3 | AC106795.1 |



|            |            |            |            |            |       |
|------------|------------|------------|------------|------------|-------|
| TFAP2A-AS1 | AC026801.2 | AC084024.4 | AP000553.1 | AC233968.1 | TNNI3 |
| LINC01970  | AL451069.2 | CCR2       | IFI6       | HPGDS      | KCTD4 |
| SAMD3      | SPTY2D1OS  | IGLC2      | CYP4B1     | FLJ31104   | CHAC1 |

3

4 **Table S3.** Top twenty genes in network ranked by Stress method.

| Rank | Name     | Score  |
|------|----------|--------|
| 1    | MMP9     | 363452 |
| 2    | NOTCH1   | 334860 |
| 3    | IL10     | 238362 |
| 4    | CXCL8    | 236866 |
| 5    | PTGS2    | 230172 |
| 6    | MMP2     | 209894 |
| 7    | HSPG2    | 131514 |
| 8    | BGN      | 130338 |
| 9    | SPP1     | 123834 |
| 10   | THBS2    | 117296 |
| 11   | POMC     | 106980 |
| 12   | BMP2     | 105448 |
| 13   | LOX      | 103082 |
| 14   | HPGDS    | 101106 |
| 15   | KDR      | 96550  |
| 16   | S100A7   | 92236  |
| 17   | SERPINE1 | 91188  |
| 18   | THY1     | 89584  |
| 19   | COL1A1   | 89354  |
| 20   | MUC1     | 86354  |

5

6 **Table S4.** The interactions between miRNA and hub genes, TFs and miRNAs, and miRNAs and  
7 hub genes in the regulatory network.

| <b>TF/miRNA regulatory pairs</b> |                     |                     |
|----------------------------------|---------------------|---------------------|
| DNMT1/hsa-miR-200b               | DNMT1/hsa-miR-429   | DNMT1/hsa-miR-27b   |
| DNMT1/hsa-miR-30a                | DNMT1/hsa-miR-30c   | SMAD3/hsa-miR-200b  |
| SMAD3/hsa-miR-20a                | SMAD3/hsa-miR-17    | SMAD3/hsa-miR-30d   |
| SMAD3/hsa-miR-27a                | SMAD3/hsa-miR-140   | SMAD3/hsa-miR-29b   |
| HDAC4/hsa-miR-429                | HDAC4/hsa-miR-200b  | HDAC4/hsa-miR-29c   |
| HDAC4/hsa-miR-29a                | NFKB1/hsa-miR-200b  | NFKB1/hsa-miR-17    |
| NFKB1/hsa-miR-106b               | NFKB1/hsa-miR-429   | NFKB1/hsa-miR-27b   |
| NFKB1/hsa-miR-93                 | NFKB1/hsa-miR-29b   | NFKB1/hsa-miR-30c   |
| NFKB1/hsa-miR-29c                | NFKB1/hsa-miR-29a   | E2F3/hsa-miR-200b   |
| E2F3/hsa-miR-20a                 | E2F3/hsa-miR-27b    | E2F3/hsa-miR-106b   |
| E2F3/hsa-miR-17                  | ASCL2/hsa-miR-200b  | ASCL2/hsa-miR-200c  |
| ASCL2/hsa-miR-429                | EPAS1/hsa-miR-24    | EPAS1/hsa-miR-27a   |
| EPAS1/hsa-miR-30d                | EPAS1/hsa-miR-29c   | NFE2L2/hsa-miR-200c |
| NFE2L2/hsa-miR-106b              | NFE2L2/hsa-miR-140  | NFE2L2/hsa-miR-93   |
| NFE2L2/hsa-miR-29b               | NFE2L2/hsa-miR-29c  | NFE2L2/hsa-miR-29a  |
| TP53/hsa-miR-200b                | TP53/hsa-miR-200c   | TP53/hsa-miR-17     |
| TP53/hsa-miR-106a                | TP53/hsa-miR-27a    | TP53/hsa-miR-429    |
| TP53/hsa-miR-27b                 | TP53/hsa-miR-20a    | TP53/hsa-miR-519d   |
| TP53/hsa-miR-29a                 | TWIST1/hsa-miR-200b | TWIST1/hsa-miR-200c |
| TWIST1/hsa-miR-27a               | TWIST1/hsa-miR-429  | TAF15/hsa-miR-20a   |
| TAF15/hsa-miR-17                 | AP-1/hsa-miR-27b    | AP-1/hsa-miR-30a    |
| AP-1/hsa-miR-29a                 | ZEB2/hsa-miR-429    | ZEB2/hsa-miR-200b   |
| ZEB2/hsa-miR-200c                | FOXF2/hsa-miR-429   | FOXF2/hsa-miR-200b  |
| E2F7/hsa-miR-27b                 | E2F7/hsa-miR-106b   | E2F7/hsa-miR-93     |

|                    |                    |                    |
|--------------------|--------------------|--------------------|
| SNAI1/hsa-miR-429  | SNAI1/hsa-miR-200b | SNAI1/hsa-miR-200c |
| EZH2/hsa-miR-429   | EZH2/hsa-miR-200b  | EZH2/hsa-miR-200c  |
| EZH2/hsa-miR-30a   | EZH2/hsa-miR-27a   | EZH2/hsa-miR-30d   |
| MITF/hsa-miR-106a  | MITF/hsa-miR-20b   | MITF/hsa-miR-338   |
| MITF/hsa-miR-140   | MITF/hsa-miR-29a   | SIX1/hsa-miR-200b  |
| SIX1/hsa-miR-200c  | SLUG/hsa-miR-200b  | SLUG/hsa-miR-200c  |
| SMAD2/hsa-miR-27a  | SMAD2/hsa-miR-30d  | HDAC1/hsa-miR-200b |
| HDAC1/hsa-miR-429  | HDAC1/hsa-miR-30d  | HDAC1/hsa-miR-140  |
| ESR2/hsa-miR-30a   | ESR2/hsa-miR-27b   | MEN1/hsa-miR-27a   |
| MEN1/hsa-miR-27b   | MNT/hsa-miR-20a    | MNT/hsa-miR-17     |
| TLX3/hsa-miR-20a   | TLX3/hsa-miR-17    | HES1/hsa-miR-20a   |
| HES1/hsa-miR-17    | E2F2/hsa-miR-20a   | E2F2/hsa-miR-17    |
| NKX2-5/hsa-miR-20a | NKX2-5/hsa-miR-17  | ARNT/hsa-miR-93    |
| ARNT/hsa-miR-106b  | ATF4/hsa-miR-93    | ATF4/hsa-miR-106b  |
| HDAC2/hsa-miR-200b | HDAC2/hsa-miR-200c | HDAC2/hsa-miR-30d  |
| HDAC2/hsa-miR-429  | HDAC2/hsa-miR-29c  | AHR/hsa-miR-93     |
| AHR/hsa-miR-106b   | HNF4A/hsa-miR-200b | HNF4A/hsa-miR-200c |
| HNF4A/hsa-miR-410  | HNF4A/hsa-miR-485  | HNF4A/hsa-miR-543  |
| ZEB1/hsa-miR-200b  | ZEB1/hsa-miR-200c  | ZEB1/hsa-miR-429   |
| ZEB1/hsa-miR-140   | GRHL2/hsa-miR-200b | GRHL2/hsa-miR-200c |
| GRHL2/hsa-miR-429  | DNMT3B/hsa-miR-29b | DNMT3B/hsa-miR-29a |
| TLX1/hsa-miR-20a   | TLX1/hsa-miR-17    | HIF1A/hsa-miR-200c |
| HIF1A/hsa-miR-24   | HIF1A/hsa-miR-106b | HIF1A/hsa-miR-429  |
| HIF1A/hsa-miR-27a  | HIF1A/hsa-miR-140  | HIF1A/hsa-miR-20a  |
| HIF1A/hsa-miR-30a  | HIF1A/hsa-miR-93   | HIF1A/hsa-miR-30d  |
| HIF1A/hsa-miR-29c  | TP73/hsa-miR-429   | TP73/hsa-miR-200b  |
| KLF4/hsa-miR-429   | KLF4/hsa-miR-200b  | KLF4/hsa-miR-200c  |

|                          |                    |             |
|--------------------------|--------------------|-------------|
| TEAD1/hsa-miR-93         | TEAD1/hsa-miR-106b |             |
| <b>TF/hub gene pairs</b> |                    |             |
| SMAD3/THY1               | SMAD3/BMP2         | SMAD3/LOX   |
| SMAD3/KDR                | SMAD3/MMP9         | NFKB1/THY1  |
| NFKB1/MMP9               | EPAS1/THY1         | EPAS1/LOX   |
| NFE2L2/LOX               | NFE2L2/KDR         | NFE2L2/MMP9 |
| TP53/THY1                | TP53/BMP2          | TP53/LOX    |
| TP53/MMP9                | TWIST1/THY1        | TWIST1/MMP9 |
| TAF15/MMP9               | AP-1/THY1          | AP-1/BMP2   |
| AP-1/LOX                 | AP-1/KDR           | AP-1/MMP9   |
| E2F7/THY1                | EZH2/THY1          | EZH2/BMP2   |
| EZH2/LOX                 | EZH2/KDR           | EZH2/MMP9   |
| MITF/THY1                | MITF/BMP2          | MITF/LOX    |
| MITF/KDR                 | MITF/MMP9          | SIX1/LOX    |
| SLUG/THY1                | SLUG/BMP2          | SLUG/LOX    |
| SLUG/KDR                 | SLUG/MMP9          | SMAD2/THY1  |
| SMAD2/BMP2               | SMAD2/LOX          | SMAD2/KDR   |
| SMAD2/MMP9               | HDAC1/THY1         | HDAC1/BMP2  |
| HDAC1/LOX                | HDAC1/KDR          | HDAC1/MMP9  |
| ESR2/THY1                | ESR2/LOX           | ARNT/THY1   |
| ARNT/BMP2                | ARNT/LOX           | ARNT/MMP9   |
| ATF4/BMP2                | ATF4/LOX           | HDAC2/BMP2  |
| HDAC2/LOX                | HDAC2/KDR          | HDAC2/MMP9  |
| AHR/BMP2                 | AHR/LOX            | AHR/KDR     |
| HNF4A/LOX                | HNF4A/MMP9         | ZEB1/LOX    |
| ZEB1/MMP9                | GRHL2/THY1         | DNMT3B/THY1 |
| TLX1/MMP9                | HIF1A/THY1         | HIF1A/BMP2  |

|                             |                   |                   |
|-----------------------------|-------------------|-------------------|
| HIF1A/LOX                   | HIF1A/KDR         | HIF1A/MMP9        |
| KLF4/THY1                   | KLF4/LOX          | KLF4/KDR          |
| TEAD1/THY1                  | TEAD1/KDR         |                   |
| <b>miRNA/hub gene pairs</b> |                   |                   |
| hsa-miR-485/THY1            | hsa-miR-543/BMP2  | hsa-miR-374a/BMP2 |
| hsa-miR-106b/BMP2           | hsa-miR-519d/BMP2 | hsa-miR-140/BMP2  |
| hsa-miR-106a/BMP2           | hsa-miR-374b/BMP2 | hsa-miR-410/BMP2  |
| hsa-miR-20a/BMP2            | hsa-miR-17/BMP2   | hsa-miR-526b/BMP2 |
| hsa-miR-93/BMP2             | hsa-miR-20b/BMP2  | hsa-miR-29b/LOX   |
| hsa-miR-29c/LOX             | hsa-miR-29a/LOX   | hsa-miR-30d/LOX   |
| hsa-miR-30c/LOX             | hsa-miR-27b/LOX   | hsa-miR-30a/LOX   |
| hsa-miR-27a/LOX             | hsa-miR-429/LOX   | hsa-miR-200b/LOX  |
| hsa-miR-200c/LOX            | hsa-miR-24/LOX    | hsa-miR-338/KDR   |
| hsa-miR-665/KDR             |                   |                   |

8

9 **Figure S1.** ClueGO identified clusters of significantly enriched GO terms in BP (A), CC (B), and  
10 MF (C). (D) Network of KEGG enriched terms colored by p-value, where terms containing more  
11 genes tend to have a more significant p-value.

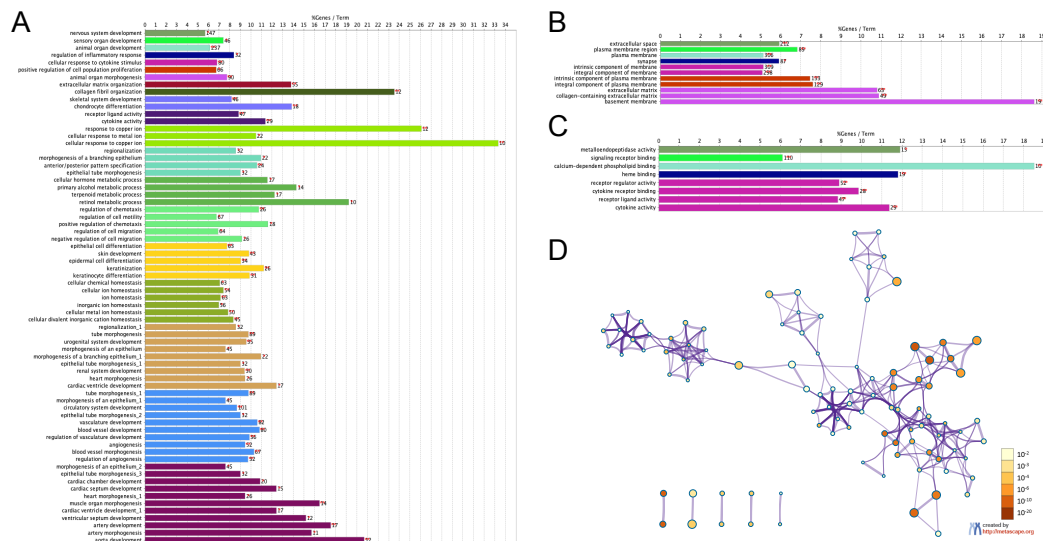

12

13

13 **Supplementary Figure 2.** (A) Heatmap illustrating the gene expression network. The brighter  
 14 color indicates lower overlap, and the comparatively darker red color indicates higher overlap.  
 15 Modules are defined as branch-like structures on the dendrogram. (B) A hierarchical clustering  
 16 dendrogram and heatmap of module eigengene correlations. The hierarchical clustering  
 17 dendrogram is overlaid with symbols identifying gene subnetworks, while the heatmap in the  
 18 lower panel shows the eigengene adjacency.

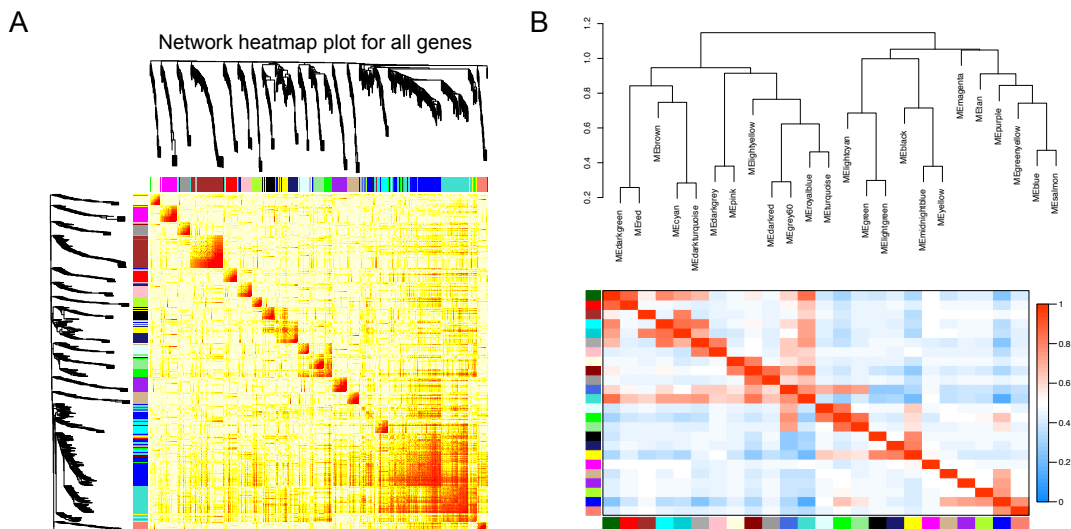

19
